# Supplementary material for: The moderating role of physical fitness in the relationship between sugar-sweetened beverage consumption and adiposity in schoolchildren
Source: Springer Nature journal article supplement (doi:10.1038/s41598-022-23092-1), 2022-11-03

**A**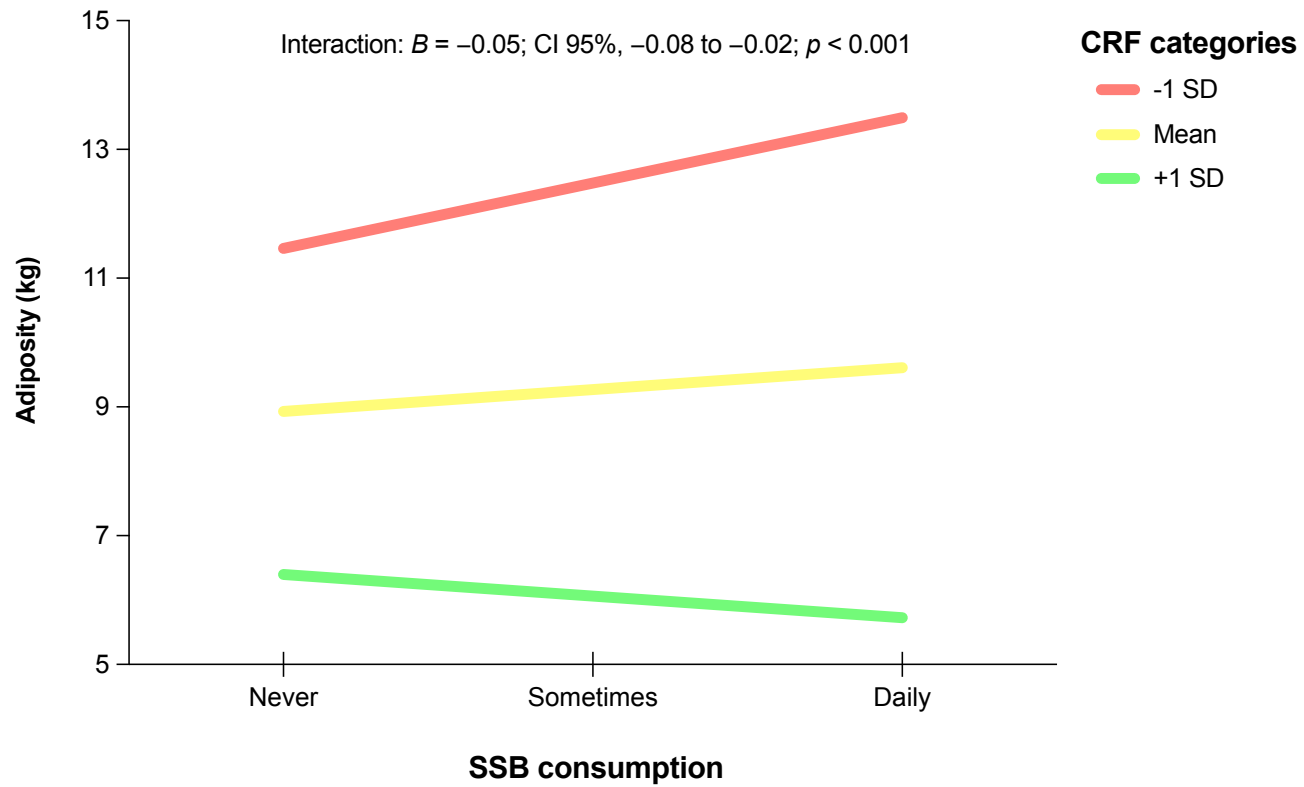**B**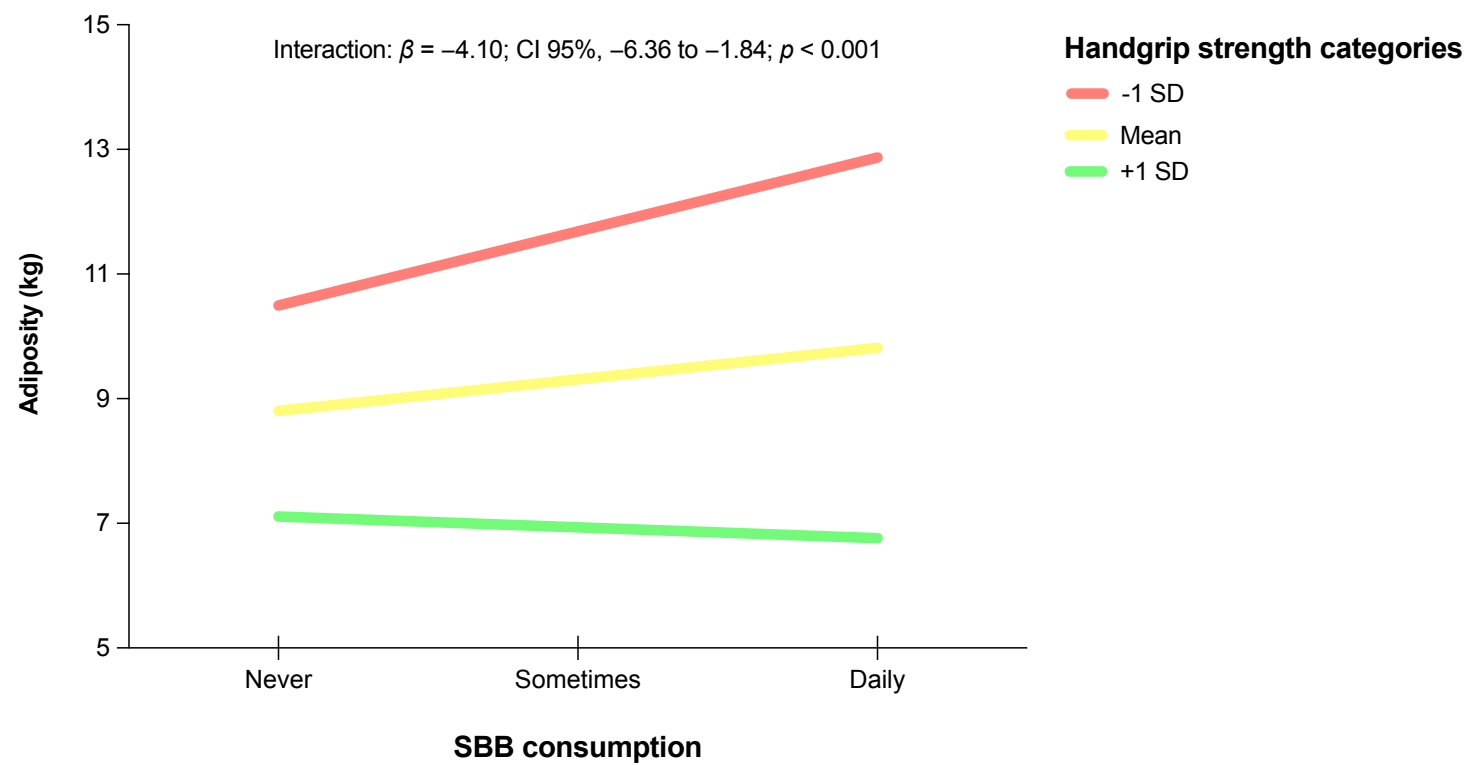

Supplement: 41598_2022_23092_MOESM2_ESM.pdf [file 41598_2022_23092_MOESM2_ESM.pdf]
